1     **Interspike intervals within retinal spike bursts combinatorially encode**  
2                                   **multiple stimulus features**

3

4                                   Toshiyuki Ishii<sup>1,2,3</sup> and Toshihiko Hosoya<sup>1#\*</sup>

5     <sup>1</sup> RIKEN Center for Brain Science and RIKEN Brain Science Institute, Wako-shi, Saitama 351-  
6     0198, Japan.

7     <sup>2</sup> Toho University, Funabashi-shi, Chiba 274-8510, Japan.

8     <sup>3</sup> Department of Physiology, Nippon Medical School, Bunkyo-ku, Tokyo 113-8602, Japan.

9     # Current address: Biomedical Research Department, Ricoh Company Ltd, Kawasaki-shi,  
10    Kanagawa 210-0821, Japan.

11    \* **Corresponding author:**

12    E-mail: toshihiko.hosoya@jp.ricoh.com.

## 13 **Abstract**

14 Neurons in various regions of the brain generate spike bursts. While the number of spikes within  
15 a burst has been shown to carry information, information coding by interspike intervals (ISIs) is  
16 less well understood. In particular, a burst with  $k$  spikes has  $k-1$  intraburst ISIs, and these  $k-1$   
17 ISIs could theoretically encode  $k-1$  independent values. In this study, we demonstrate that such  
18 combinatorial coding occurs for retinal bursts. By recording ganglion cell spikes from isolated  
19 salamander retinæ, we found that intraburst ISIs encode oscillatory light sequences that are  
20 much faster than the light intensity modulation encoded by the number of spikes. When a burst  
21 has three spikes, the two intraburst ISIs combinatorially encode the amplitude and phase of the  
22 oscillatory sequence. Analysis of trial-to-trial variability suggested that intraburst ISIs are  
23 regulated by two independent mechanisms responding to orthogonal oscillatory components, one  
24 of which is common to bursts with different number of spikes. Therefore, the retina encodes  
25 multiple stimulus features by exploiting all degrees of freedom of burst spike patterns, i.e., the  
26 spike number and multiple intraburst ISIs.

## 27 **Author Summary**

28 Neurons in various regions of the brain generate spike bursts. Bursts are typically composed of a  
29 few spikes generated within dozens of milliseconds, and individual bursts are separated by much  
30 longer periods of silence (~hundreds of milliseconds). Recent evidence indicates that the number  
31 of spikes in a burst, the interspike intervals (ISIs), and the overall duration of a burst, as well as  
32 the timing of burst onset, encode information. However, it remains unknown whether multiple  
33 ISIs within a single burst encode multiple independent information contents. Here we  
34 demonstrate that such combinatorial ISI coding occurs for spike bursts in the retina. We recorded

35 ganglion cell spikes from isolated salamander retinæ stimulated with computer-generated  
36 movies. Visual response analyses indicated that multiple ISIs within a single burst  
37 combinatorially encode the phase and amplitude of oscillatory light sequences, which are  
38 different from the stimulus feature encoded by the spike number. The result demonstrates that the  
39 retina encodes multiple stimulus features by exploiting all degrees of freedom of burst spike  
40 patterns, i.e., the spike number and multiple intraburst ISIs. Because synaptic transmission in the  
41 visual system is highly sensitive to ISIs, the combinatorial ISI coding must have a major impact  
42 on visual information processing.

## 43 **Introduction**

44 Understanding the rules by which neuronal spike patterns encode information is essential for  
45 investigating the complex functioning of the nervous system [1, 2]. Neurons in various brain  
46 areas generate spike bursts, which are characterized by clusters of high-frequency spikes  
47 separated by longer periods of silence [3-5]. Burst spikes typically occur within the temporal  
48 window of postsynaptic integration (dozens of milliseconds), and thereby inducing synaptic  
49 response with higher probability than isolated single spikes [6-8]. In this regard, bursts are  
50 believed to represent an important neuronal code [7, 9, 10]. Previous analyses of burst  
51 information coding have suggested that the number of spikes within a burst [4, 11-19], the onset  
52 timing of a burst [5, 6, 20-22], and the duration of a burst [15, 23] all carry information.

53 Because a burst has multiple spikes, it has one or more intraburst interspike intervals (ISIs).  
54 In theory, these intraburst ISIs can carry information if, for example, they are modulated by  
55 sensory inputs. Such burst ISI coding should have significant effects on information transfer,  
56 because the efficiency of synaptic transmission is sensitive to ISIs [24]. Consistent with this idea,

57 recent studies suggest that ISIs within bursts carry information [15, 19, 23, 25]. Although these  
58 studies have shown that the first ISI and average ISI within a burst carry information, interaction  
59 among multiple ISIs has been unclear. Theoretically, bursts with  $k$  spikes have  $k-1$  intraburst  
60 ISIs, and these  $k-1$  ISIs could encode  $k-1$  independent values that represent information.  
61 Whether burst ISIs encode information in such a combinatorial manner is unknown.

62 In the vertebrate retina, retinal ganglion cells (i.e., the output neurons) generate spike bursts  
63 [3, 4, 26]. While the number of spikes within bursts encodes the amplitude of light intensity  
64 modulation [4], it is unknown whether intraburst ISIs encode information. In this study, using  
65 isolated salamander retinæ, we investigated whether intraburst ISIs encode information  
66 regarding visual input. Our results indicated that intraburst ISIs encode oscillatory light intensity  
67 sequences different from the stimulus feature encoded by the spike number. When bursts  
68 contained three spikes, the two ISIs combinatorially encoded the amplitude and phase of the  
69 oscillatory components. Further analysis of the trial-to-trial variability suggested that intraburst  
70 ISIs are determined by two independent neuronal mechanisms that respond to two orthogonal  
71 oscillatory components. Collectively, our findings demonstrate that multiple ISIs within a retinal  
72 burst combinatorially encode multiple independent stimulus features that are different from that  
73 encoded by the spike number.

## 74 **Results**

### 75 **Burst spike numbers encode the amplitude of light intensity modulation**

76 We stimulated isolated larval salamander retinæ using a spatially uniform visual stimulus with  
77 intensity modulation set at 30 Hz. Ganglion cell action potentials were recorded using a multi-  
78 electrode array. OFF ganglion cells, constituting the majority of the larval salamander retinal

79 ganglion cells, generated spike bursts (Fig 1A). The majority of the spikes [82.0% ± 8.7%, mean  
 80 ± SD (standard deviation),  $n = 41$  cells] were observed in bursts comprised of two or more  
 81 spikes, indicating that multi-spike bursts represent the major retinal code.

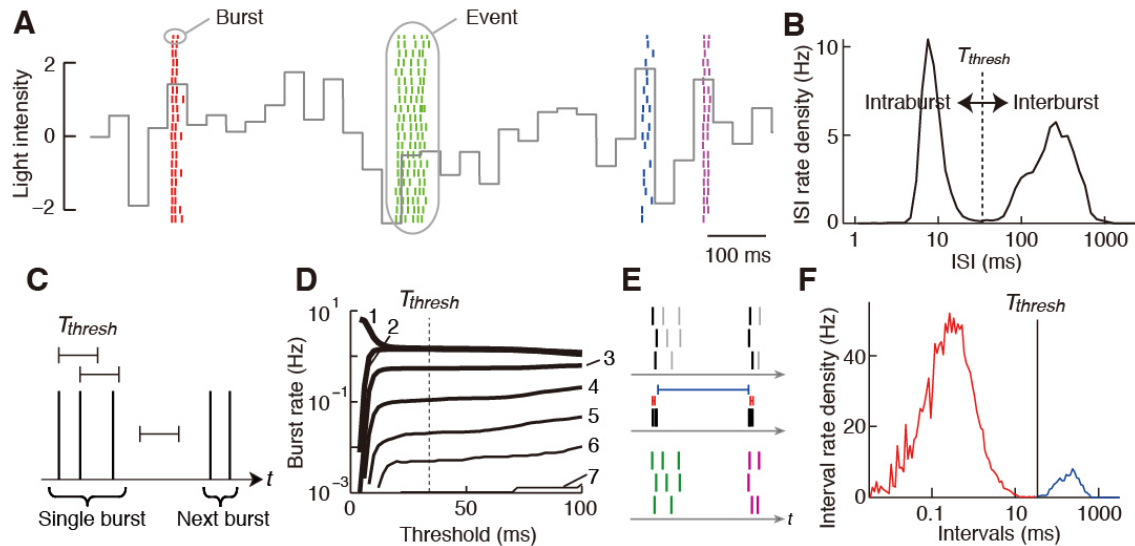

82

83 **Fig 1. Retinal ganglion cells generate reproducible bursts.** Data from a single salamander  
 84 OFF ganglion cell. (A) Raster plot. Short vertical lines represent single spikes and each row  
 85 shows spikes that occurred during a single repeat of the stimulation. Spikes of different events  
 86 are shown in different colors. The gray continuous line shows the normalized light intensity of  
 87 the stimulus (the mean and SD are 0 and 1, respectively). (B) ISI histogram. (C) Schematic  
 88 illustration of the algorithm to define bursts. (D) Rates of isolated spikes (1) and bursts with 2–7  
 89 spikes (2–7) plotted against the threshold interval. (E) Schematic illustration of the algorithm to  
 90 define events. (F) Histogram of intervals between merged onsets. The red and blue portions  
 91 indicate intervals shorter and longer than  $T_{thresh}$ , respectively.

92 During repeated presentation of the same stimulus, individual ganglion cells generated spike  
93 bursts at similar time-points across repeats (Fig 1A) [3, 4]. This reproducibility enabled the  
94 identification of corresponding bursts across repeats, which we termed “events” (Fig 1 and  
95 Materials and Methods) [3, 4]. Bursts generated in the same event had similar numbers of spikes  
96 in different repeats of the stimulus, while those in different events often had different numbers of  
97 spikes (Fig 1A). Accordingly, the number of spikes within bursts carried information about the  
98 stimulus ( $p < 0.01$  for 41 of the 41 cells; the estimated mutual information was  $0.80 \pm 0.31$  bits  
99 per burst, mean  $\pm$  SD,  $n = 41$ ). We next calculated the burst-triggered averages (BTAs), which  
100 represent the average stimulus sequence preceding isolated spikes and bursts with two, three, and  
101 four spikes (1-, 2-, 3-, and 4-BTA, respectively). The BTAs were sequences of different  
102 amplitudes (Fig 2A), and the difference between 1-BTA and 3-BTA had ON and OFF peaks  
103 around  $-170$  and  $-40$  ms relative to the burst onset (Fig 2B). This result indicates that the  
104 number of spikes within a burst encodes the amplitude of ON-to-OFF light intensity modulation  
105 within an interval of  $\sim 130$  ms.

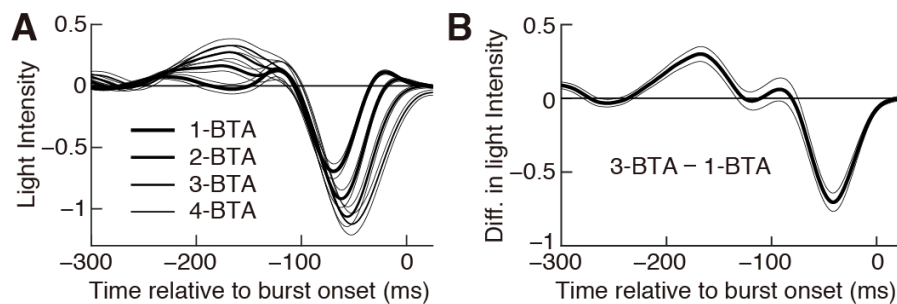

106  
107 **Fig 2. Spike number within a burst encodes the amplitude of light intensity modulation.** (A)  
108 1-, 2-, 3-, and 4-BTA indicate the averages of all stimulus sequences preceding isolated spikes,  
109 2-, 3-, and 4-spike bursts, respectively. (B) Difference between 3-BTA and 1-BTA. Thick and  
110 thin lines indicate the average and standard error of mean (SEM) values, respectively.  $n = 41$   
111 cells.

## 112 **Burst ISIs encode oscillatory light intensity sequences**

113 To investigate whether intraburst ISIs carry information, we first analyzed bursts composed of  
114 two spikes (2-spike bursts). For each ganglion cell, 2-spike bursts in the same event tended to  
115 have similar ISIs, whereas those in different events typically had different ISIs (Fig 3A). This  
116 suggested that intraburst ISIs convey information about the stimulus. Calculation of the mutual  
117 information confirmed this notion ( $p < 0.01$  for 41 of the 41 cells;  $0.33 \pm 0.10$  bits per burst,  $n =$   
118 41).

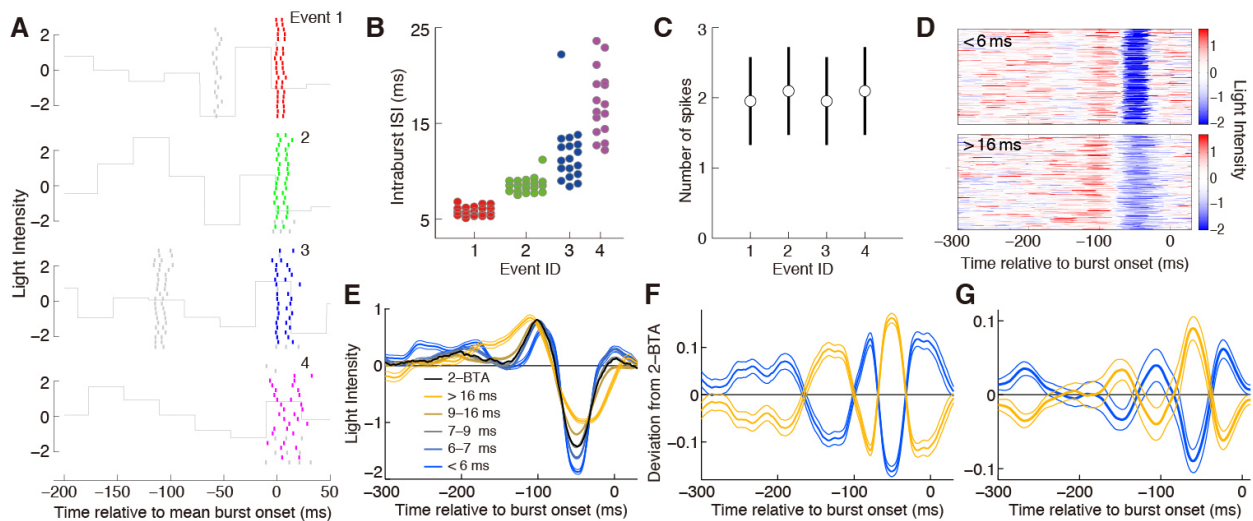

## 120 **Fig 3. Intraburst ISIs of 2-spike bursts encode an oscillatory component of the visual input.**

121 (A-F) Data from the cell shown in Fig 1. (A) Raster plot. Colored lines represent 2-spike bursts.  
122 Short gray lines are the other spikes. The gray continuous line indicates light intensity, as shown  
123 in Fig 1A. Event IDs are shown. (B and C) Intraburst ISIs of 2-spike bursts (B) and the average  
124 and SD of the spike number (C) of the four events shown in (A). (D) Stimulus sequences  
125 preceding 2-spike bursts with an intraburst ISI of  $<6.0$  (top) and  $>16.0$  ms (bottom) are aligned  
126 with respect to the burst onset. (E) The thick black line indicates the average of all stimulus  
127 sequences preceding 2-spike bursts (2-BTA). Thick colored lines indicate the average of stimulus

128 sequences preceding 2-spike bursts with different intraburst ISIs. Thin lines indicate SEM  
129 values. **(F)** Thick yellow and blue lines indicate the average of the stimulus sequence preceding  
130 2-spike bursts with the longest and shortest 50% of intraburst ISIs, respectively, from which the  
131 2-BTA is subtracted. The thin lines indicate SEM values. **(G)** Population analysis. Thick lines  
132 indicate the data shown by the thick lines in (F) averaged among 19 cells that generated at least  
133 1500 2-spike bursts. Thin lines represent SEM values.

134 Two-spike burst ISIs were not correlated to the average number of spikes in events (Fig 3B  
135 and C; correlation =  $0.0 \pm 0.1$ , mean  $\pm$  SD,  $n = 41$ ), suggesting that these ISIs were modulated  
136 according to stimulus features different from those modulating the spike number. To characterize  
137 the stimulus features modulating 2-spike burst ISIs, we extracted the stimulus sequences  
138 preceding 2-spike bursts with different ISIs (Fig 3D and E). The results show that the stimulus  
139 sequences had systematic differences depending on the ISIs. We next subtracted the 2-BTA  
140 (black in Fig 3E) from the average of sequences preceding 2-spike bursts with long ISIs. The  
141 result was an oscillating sequence with two ON and two OFF peaks (yellow in Fig 3F and G).  
142 The subtraction from the 2-spike bursts with short ISIs gave the same sequence, but with the  
143 opposite sign (blue in Fig 3F and G). These results indicate that 2-spike burst ISIs encode an  
144 oscillatory deviation from the 2-BTA. Intervals between the ON and OFF peaks were  $\sim 40$  ms  
145 (Fig 3F and G) and, therefore, were much shorter than those of the stimulus feature encoded by  
146 the spike number ( $\sim 130$  ms; Fig 2B). Thus, two-spike burst ISIs encode oscillatory sequences  
147 much faster than the intensity modulation encoded by the spike number.



148 **The two ISIs of three-spike bursts encode the phase and amplitude of oscillatory**  
149 **components**

150 We next investigated the characteristics of 3-spike bursts. The first and second intraburst ISIs  
151 ( $ISI_1$  and  $ISI_2$ ) tended to be different for different events (Fig 4A and B) and carried information  
152 about the stimulus ( $p < 0.01$  for 40 of the 41 cells;  $0.46 \pm 0.21$  bits per burst,  $n = 41$ ). In addition,  
153 the data suggest that  $ISI_1$  and  $ISI_2$  were modulated differently. For example, in Fig 4A,  $ISI_1$  was  
154 similar between the first (red) and second (green) events, but tended to be different for the third  
155 event (blue). In contrast,  $ISI_2$  was similar between the second and third events, but different for  
156 the first event. Accordingly, in the two-dimensional plot of  $ISI_1$  and  $ISI_2$ , bursts of different  
157 events occupied different locations, and events did not align one-dimensionally, but were  
158 distributed two-dimensionally (Fig 4B).

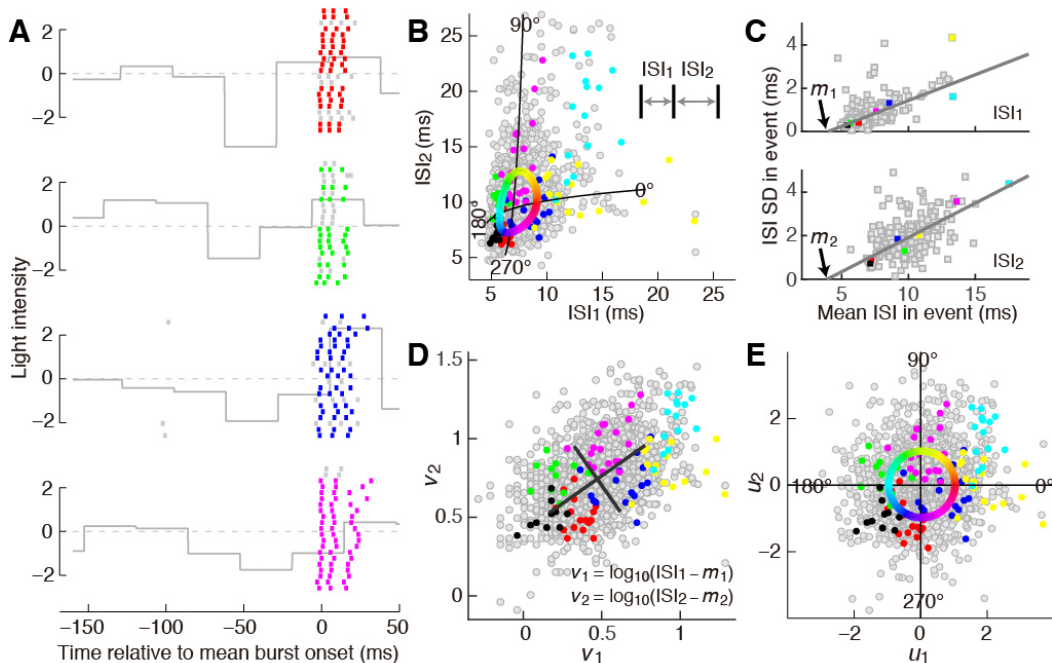

159

160 **Fig 4. ISI patterns of three-spike bursts.** Data from the cell shown in Fig 1. **(A)** Raster plot.  
161 Colored lines represent 3-spike bursts. Short gray lines are other spikes. The gray continuous line  
162 indicates the light intensity as shown in Fig 1A. **(B)** Distribution of  $ISI_1$  and  $ISI_2$ . Each dot  
163 represents a 3-spike burst. Colored dots are bursts generated in seven different events, four of  
164 which are shown in (A) with the same color. Gray dots represent all other bursts. Black lines are  
165 the  $u_1$  and  $u_2$  axes. Burst phases are shown. The colors in the circle represent burst phases. **(C)**  
166 Variability of ISIs. Each dot represents an event. The horizontal and vertical axes are the average  
167 and SD of ISIs in an event, respectively. Gray lines show linear fits. **(D)**  $v_1$  and  $v_2$  were  
168 determined as indicated by the equations. Each dot represents a 3-spike burst. Black lines  
169 indicate the principle axes. The length of the lines represents the SD in the axis of the  
170 corresponding principle components. The coordinates of the crossing points are the averages of  
171  $v_1$  and  $v_2$ . **(E)**  $u_1$  and  $u_2$  determined by linear scaling of  $v_1$  and  $v_2$  along the principle  
172 axes. The colors in the circle show burst phases.

173 The above results suggest that the modulation of  $ISI_1$  and  $ISI_2$  has two degrees of freedom.  
174 The distribution of  $ISI_1$  and  $ISI_2$  had features that complicate further analysis. First, events with  
175 longer ISIs tended to have larger trial-to-trial ISI variability than events with shorter ISIs (Fig  
176 4C). This inhomogeneous variability suggests that shorter ISIs represent information with a  
177 resolution higher than that represented by longer ISIs. Second, although  $ISI_1$  and  $ISI_2$  were  
178 modulated differently, they were not completely independent, but were correlated (Fig 4B;  
179 correlation coefficient =  $0.16 \pm 0.14$ , mean  $\pm$  SD,  $n = 41$ ). We were able to correct the first point  
180 by non-linearly scaling  $ISI_1$  and  $ISI_2$  so that different events had similar variability (Fig 4C and  
181 D). To correct the second point, variables were further linearly scaled to have an approximately  
182 circularly symmetric distribution so that the correlation was negligible (Fig 4E; correlation

183 coefficient =  $-0.01 \pm 0.13$ ,  $n = 41$ ). The resultant variables,  $u_1$  and  $u_2$ , had a circularly  
184 symmetric distribution and, therefore, were approximately independent, with different events  
185 occupying a similar amount of area (Fig 4E).

186 Using  $u_1$  and  $u_2$ , we defined the “burst phase” for each burst (Fig 4B and E). Stimulus  
187 sequences preceding 3-spike bursts exhibited systematic differences according to the burst phase  
188 (Fig 5A). We subtracted the 3-BTA (Fig 5B) from the sequences preceding 3-spike bursts. The  
189 resulting deviations were oscillatory components with two or three ON peaks separated by 70–80  
190 ms, with OFF peaks among them (Fig 5C–E). The intervals between these peaks were almost  
191 constant, but their timing relative to the onset of bursts shifted depending on the burst phase (Fig  
192 5C–E). When the burst phase increased from  $0^\circ$  to  $360^\circ$ , the peaks moved closer to the burst  
193 onset (Fig 5C–E), and the timing of the major ON peaks showed approximately linear  
194 dependence on the burst phase (Fig 5C–E). These results indicate that the phase of 3-spike bursts  
195 encodes the temporal phase of an oscillatory component. In addition, we found that the distance  
196 of the point  $(u_1, u_2)$  from the origin of the  $u_1$ – $u_2$  plane encodes the amplitude of the  
197 oscillatory component (Fig 5F). Similar coding was found for bursts elicited with natural scene  
198 movies (Fig 6).

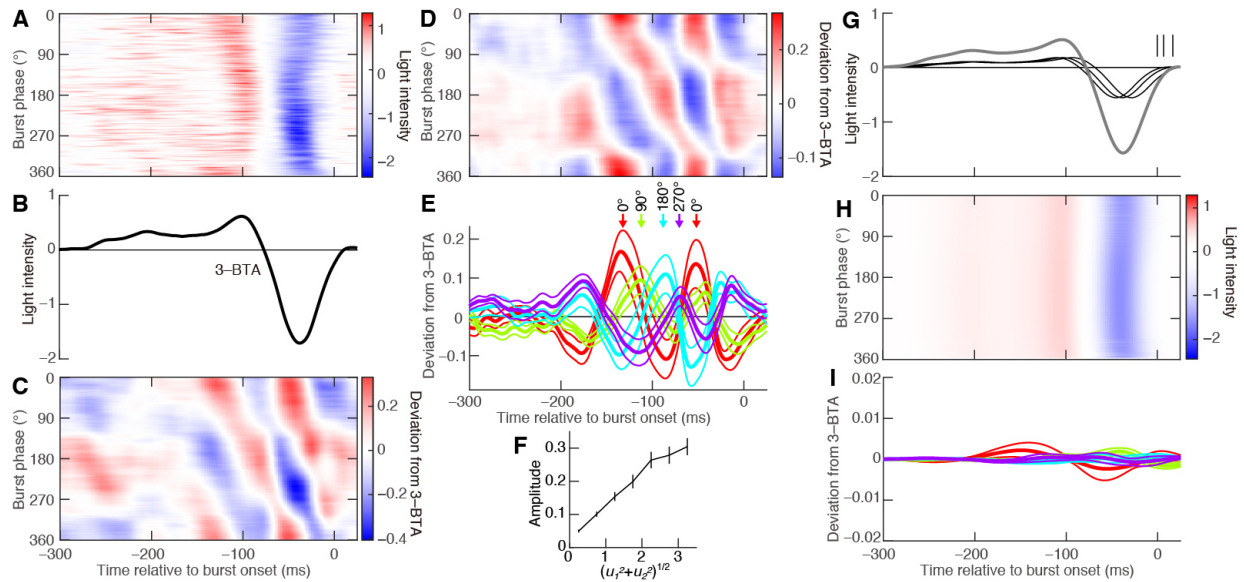

199

200 **Fig 5. 3-spike burst ISI patterns encode the phase and amplitude of oscillatory components.**

201 (A–C) Analysis of the cell shown in Fig 1. (A) Stimulus sequences preceding 3-spike bursts with

202 different burst phases. (B) The average of all stimulus sequences preceding 3-spike bursts (3-

203 BTA). (C) Data in (A) from which the 3-BTA is subtracted. (D–F) Population analyses. (D)

204 Same analysis as in (C), averaged among 19 cells that generated at least 1200 3-spike bursts. (E)

205 Thick lines indicate data in (D) at the indicated burst phases. Thin lines indicate the SEM values.

206 Peaks around –100 ms are indicated. (F) Horizontal axis:  $(u_1^2 + u_2^2)^{1/2}$ , i.e., the distance of the

207 point  $(u_1, u_2)$  from the origin in the  $u_1$ – $u_2$  plane in Fig 4E. Vertical axis: the root mean square

208 of the oscillatory components between –200 and 25 ms. The error bars indicate SEM values for

209 the 19 cells. (G–I) Reconstruction analyses. (G) Short vertical lines represent spikes in an

210 example burst where  $ISI_1 = 7$  ms and  $ISI_2 = 10$  ms. Thin black lines indicate STAs calculated for

211 3-spike bursts of the cell used in (A–C), shifted according to the spikes in the example burst.

212 Thick gray line indicates the reconstructed stimulus generated by adding the shifted STAs. (H)

213 Analysis similar to (A) conducted for stimuli reconstructed as in (G) using the same bursts used

214 in (A). Color-coding is as used in (A). **(I)** Population analysis similar to (E), conducted for  
 215 reconstructed stimuli.

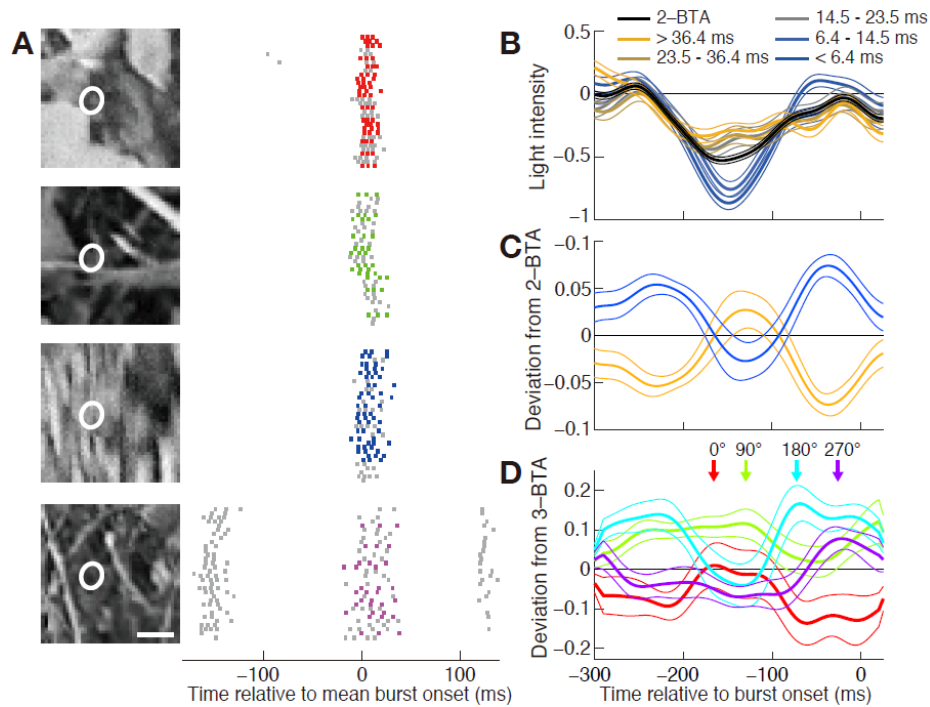

216  
 217 **Fig 6. ISI analysis of bursts elicited by natural scene stimulation. (A)** Responses of a single  
 218 ganglion cell. (Right) Raster plots. The colored dots show 3-spike bursts. (Left) Image frames at  
 219  $-60$  ms relative to the average timing of burst onsets. White ellipses show receptive field centers  
 220 determined by reverse correlation and Gaussian fitting. Bar: 1 mm. **(B-D)** Analyses using light  
 221 intensity at the receptive field center. **(B)** Analysis of 2-spike bursts of a single ganglion cell as  
 222 shown in Fig 3E. Thin lines indicate SEM values. **(C)** Population analysis of 2-spike bursts  
 223 similar to Fig 3G. Thick lines indicate the average of the stimulus sequence preceding 2-spike  
 224 bursts with the longest (orange) and shortest (blue) 50% of intraburst ISIs, from which 2-BTA is  
 225 subtracted. Thin lines indicate the SEM values. Data from 13 cells that generated more than 800  
 226 2-spike bursts. **(D)** Population analysis of 3-spike bursts similar to Fig 5E. Stimulus sequences

227 preceding 3-spike bursts with different phases. The 3-BTA is subtracted. The thick and thin lines  
228 indicate the average and SEM values among 8 cells that generated more than 1000 3-spike  
229 bursts.

230 As shown in Fig 4B, bursts with the phase  $0^\circ$  and  $180^\circ$  had only  $\sim 5$ - and  $\sim 1$ -ms differences in  
231  $ISI_1$  and  $ISI_2$ , respectively. Nevertheless, for bursts with the phase  $0^\circ$ , the ON and OFF peaks in  
232 the encoded sequences were separated by  $\sim 80$  ms, while the separation was only  $\sim 50$  ms for  
233 bursts with the phase  $180^\circ$  (Fig 5A). These results suggest that single spikes in bursts do not  
234 simply indicate the occurrence of a single characteristic in light intensity sequence. To further  
235 confirm this point, we conducted a simple reconstruction analysis. We calculated the spike-  
236 triggered averages (STA) for three-spike bursts and then generated an estimated stimulus  
237 sequence by adding the STA aligned according to the burst spikes (Fig 5G). This reconstruction  
238 failed to reproduce the observed dependence of the ON and OFF peaks on the burst phases  
239 (compare Fig 5A and H), and the deviation from the 3-BTA was much smaller than that of the  
240 actual data (compare Fig 5E and I). To quantify the amplitude of the deviation, the root mean  
241 square of the deviation from the 3-BTA was calculated for the period between  $-200$  and  $+25$  ms  
242 and averaged for all burst phases. The values were significantly larger for the actual stimuli than  
243 for the reconstructed stimuli ( $0.107 \pm 0.061$  for actual stimuli and  $0.003 \pm 0.002$  for  
244 reconstructed stimuli,  $n = 19$ ,  $P = 1.5 \times 10^{-7}$ , two-tailed Mann–Whitney–Wilcoxon test). Thus,  
245 the simple reconstruction model failed to explain the observed burst coding.

## 246 **Two independent components of burst patterns**

247 The oscillatory component encoded by 2-spike burst ISIs had peak-to-peak intervals that are  
248 similar to those of the components encoded by 3-spike bursts ( $\sim 80$  ms; compare Fig 3G and 5E),

249 suggesting that 2- and 3-spike burst ISIs are modulated by related stimulus features. To further  
 250 characterize this similarity, we analyzed events in which both 2- and 3-spike bursts were  
 251 generated (e.g., Fig 4A, bottom). For each of these events we calculated the average values of  $u_1$   
 252 and  $u_2$  for 3-spikes bursts and the average value of the 2-spike burst ISIs (Fig 7A). Plotting the  
 253 data on the  $u_1$ - $u_2$  plane showed that 2-spike burst ISIs differ systematically depending on the  
 254 position of the events along the direction of  $\sim 30^\circ$  (Fig 7B). A linear fitting indicated that the  
 255 optimum direction was  $33.1^\circ \pm 15.6^\circ$  (circular mean  $\pm$  SD,  $n = 41$ ; Fig 7C, magenta), suggesting  
 256 that 2-spike burst ISIs are modulated by an oscillatory component that modulates 3-spike burst  
 257 patterns in the orientation of  $\sim 33.1^\circ$  on the  $u_1$ - $u_2$  plane.

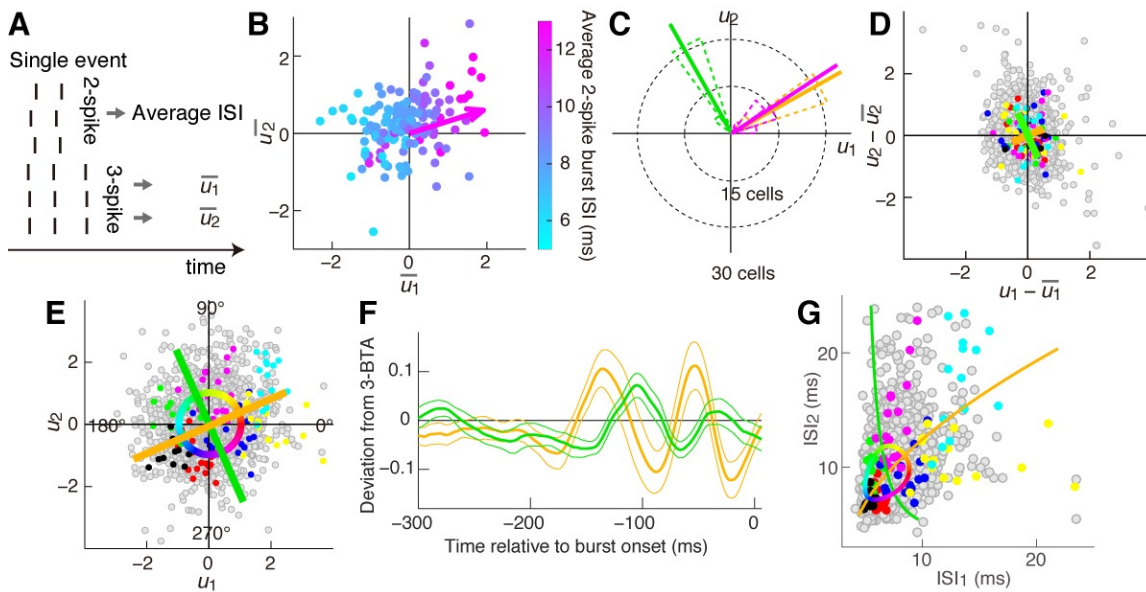

258  
 259 **Fig 7. Identification of independent components that determine burst patterns.** (A) The  
 260 average value of 2-spike burst ISI and the average values of 3-spike burst  $u_1$  and  $u_2$  were  
 261 determined for each event. (B) Dependence of 2-spike burst ISIs on 3-spike burst patterns. Each  
 262 dot represents an event in which the cell generated both 2- and 3-spike bursts. The horizontal and  
 263 vertical axes are the averages of  $u_1$  and  $u_2$  of 3-spike bursts in an event, respectively. The



264 color indicates the average ISI of 2-spike bursts. The arrow shows the orientation of the increase  
265 of 2-spike burst ISIs determined by linear fitting. **(C)** Population analyses for  $n = 41$  cells.  
266 (Magenta) The orientation of the increase of 2-spike burst ISIs determined as in (B). (Orange and  
267 green) Principle axes of trial-to-trial variations of  $u_1$  and  $u_2$ , determined as in (D). Orange  
268 shows the shorter axes. Dotted and thick lines are the circular histograms and average  
269 orientations, respectively. **(D–F)** Analyses of trial-to-trial variability. **(D)** Trial-to-trial variations  
270 of  $u_1$  and  $u_2$  in each event. Each dot represents a 3-spike burst. The orange and green lines  
271 indicate the orientation of the principle components through all events. The lengths represent the  
272 SD along the axes. Compare with Fig 4E. **(E)** The same panel as Fig 4E, shown with the  
273 orientations of the principal components in (D). **(F)** Stimulus sequences preceding bursts with  
274 the phases corresponding to the two components, as shown in Fig 5E. Data from 19 cells that  
275 generated at least 1200 3-spike bursts. **(G)** The axes and circle in (E) are plotted on the  $ISI_1$ – $ISI_2$   
276 plane.

277 The above result raises the hypothesis that the retinal mechanism that modulates 2-spike ISIs  
278 also modulates 3-spike burst patterns in the orientation of  $\sim 33.1^\circ$  on the  $u_1$ - $u_2$  plane. Since  $u_1$   
279 and  $u_2$  are suggested to have two degrees of freedom, one possibility is that another  
280 independent mechanism modulates 3-spike burst patterns in the orthogonal orientation, i.e.,  
281  $\sim 123.1^\circ$ , on the  $u_1$ - $u_2$  plane. If two such independent mechanisms were present, modulation of  
282  $u_1$  and  $u_2$  in the two orthogonal orientations would have independent trial-to-trial variations,  
283 and we tested this prediction. Although  $u_1$  and  $u_2$  had an approximately circularly symmetric  
284 distribution (Fig 4E), their trial-to-trial variations within each event had an asymmetric  
285 distribution (Fig 7D). Principal component analysis of this distribution indicated that the



286 principal axes corresponding to the smaller and larger variances were in the orientations of  $29.4^\circ$   
287  $\pm 7.3^\circ$  and  $119.4^\circ \pm 7.3^\circ$  ( $n = 41$ ; orange and green in Fig 7C and D). This analysis indicates that  
288 modulations of  $u_1$  and  $u_2$  in these two orientations have approximately independent trial-to-  
289 trial variation. Because these axes ( $\sim 29.4^\circ$  and  $\sim 119.4^\circ$ ) are close to those proposed for the  
290 hypothesis ( $\sim 33.1^\circ$  and  $\sim 123.1^\circ$ , see Fig 7C), the results are in accordance with the presence of  
291 two independent mechanisms, one of which ( $\sim 30^\circ$ ) is common to 2- and 3-spike bursts.  
292 Consistently, the oscillatory component encoded by 3-spike bursts with the phase of the common  
293 component orientation ( $29.4^\circ \pm 7.3^\circ$ ) was similar to that encoded by 2-spike burst ISIs (compare  
294 Fig. 7F, yellow and Fig 3G, yellow). Given that the total distribution of  $u_1$  and  $u_2$  is circularly  
295 symmetric, the smaller trial-to-trial variability of the  $\sim 30^\circ$  component as compared with the  
296  $\sim 120^\circ$  component indicates that the former is more precise. Therefore, the component common  
297 to 2- and 3-spike bursts is more informative than that specific to 3-spike bursts.

298 The two approximately independent components encode oscillatory components that are  
299 approximately orthogonal to each other, i.e., components with  $\sim 1/4$  cycles difference in phase  
300 (Fig 7F). This result suggests that the two orthogonal oscillatory stimulus components modulate  
301 3-spike burst patterns in the orthogonal orientations on the  $u_1$ - $u_2$  plane. This model is  
302 consistent with the above result that 3-spike burst patterns encode the amplitude and phase of an  
303 oscillatory component, since an oscillatory sequence with an arbitrary amplitude and phase can  
304 be approximated by a sum of two orthogonal oscillatory components with fixed phases and the  
305 same frequency.

## 306 **Discussion**

307 Our results reveal that intraburst ISIs of retinal bursts encode oscillatory light intensity sequences  
308 that are much faster than the sequence encoded by the spike number. When a burst has three  
309 spikes, the two intraburst ISIs combinatorially encode the amplitude and phase of the oscillatory  
310 component. These results therefore suggest that a  $k$ -spike burst ( $k = 2, 3$ ) encodes  $k$  different  
311 stimulus features by exploiting all the  $k$  degrees of freedom, i.e., the spike number and  $k-1$  ISIs.  
312 This simultaneous representation of multiple stimulus features enables multiplexed information  
313 coding, a mechanism that greatly increases the information transmission capacity [19, 27, 28].  
314 Whether this combinatorial coding occurs for bursts with  $k \geq 4$  spikes remains unknown, as  
315 these bursts were rarely observed under our experimental conditions (Fig 1D).

### 316 **Mechanisms of the combinatorial ISI coding**

317 Figure 8 shows a coding model that is consistent with our findings. The amplitude of slow light  
318 intensity modulation determines the spike number within a burst. Intraburst ISIs are regulated by  
319 two independent mechanisms that are driven by orthogonal fast oscillatory stimulus components,  
320 as suggested by the comparison between 2- and 3-spike bursts and the analysis of trial-to-trial  
321 variation. When a burst contains two spikes, the ISI is regulated by one of the two mechanisms,  
322 and thus 2-spike burst ISIs encode the amplitude of an oscillatory component of a fixed phase.  
323 When a burst has three spikes, the two mechanisms combinatorially determine the two ISIs.  
324 Because the two mechanisms are driven by the two orthogonal oscillatory components, the two  
325 ISIs of 3-spike bursts carry information about both the amplitude and phase of the oscillatory  
326 component. Modulation of the 3-spike ISI pattern by the common component is similar to  
327 modulation of the burst duration, i.e,  $ISI_1 + ISI_2$  (see yellow in Fig 7G).

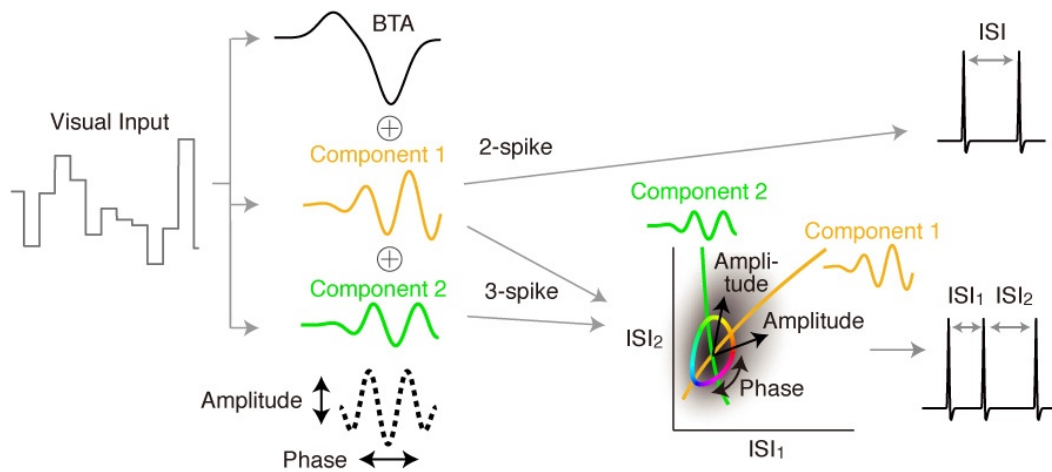

328

329 **Fig 8. Schematic view of burst coding.** The dotted line indicates the sum of the oscillatory  
330 components 1 and 2, whose amplitude and phase are encoded by the 3-spike burst pattern.

331 The two proposed mechanisms modulating intraburst ISIs exhibit approximately independent  
332 trial-to-trial variation, raising the possibility that the two mechanisms rely on two largely non-  
333 overlapping synaptic pathways. Such circuits, if present, may have different temporal properties,  
334 considering that the two mechanisms respond to two different temporal sequences. In the  
335 vertebrate retinae, bipolar cells have ~10 subtypes [29-32], and different subtypes have distinct  
336 physiological properties [32-34] and varying temporal response characteristics [35-37]. In  
337 addition, the inhibitory effect of amacrine cells on bipolar cells generates further variation of  
338 temporal properties [38]. Therefore, specific subsets of bipolar and amacrine cells may constitute  
339 largely non-overlapping synaptic pathways underling the combinatorial coding.

#### 340 **Implications for visual processing**

341 It is currently unclear to what extent the burst ISI information analyzed in this study is  
342 transmitted to the brain. However, in many brain regions, neuronal responses are sensitive to the

343 millisecond-scale temporal structure of synaptic inputs [24]. For example, in synaptic  
344 transmission from the retina to the lateral geniculate nucleus (LGN), retinal spikes with ISIs of a  
345 few milliseconds are much more effective in eliciting LGN spikes than those with ISIs of  $> \sim 20$   
346 ms [39-45]. Consistently, LGN burst ISIs are sensitive to the millisecond-scale structure of  
347 current input [19]. Similar to synaptic connections from the retina to the LGN, those from the  
348 LGN to cortical neurons are more responsive to spikes with short ISIs than those with long ISIs  
349 [46]. Such dependence of neuronal responses on input ISIs suggests that bursts with different  
350 ISIs elicit different spike responses of postsynaptic neurons. In addition, the dependence on ISIs  
351 varies among individual synaptic connections [44-46]. This variation suggests that individual  
352 synapses have different preference for bursts with different ISIs and thus may function as a  
353 system to decode burst ISIs [24]. Although the present study investigated the dependence of ISIs  
354 on the temporal patterns of visual stimuli, retinal ISIs also depend on the spatial patterns [47].  
355 Therefore, it is possible that burst ISIs encode spatial information as well as temporal  
356 information.

## 357 **Conclusions**

358 The present results suggest that the retina employs mechanisms to regulate multiple components  
359 of intraburst ISIs, and thereby encodes multiple stimulus features by exploiting all degrees of  
360 freedom of burst spike patterns, i.e., the spike number and multiple intraburst ISIs. This burst  
361 coding is likely to affect visual information transmission, as synaptic transmission is sensitive to  
362 ISIs. Because bursts occur in various regions of the brain, analyses similar to the present study  
363 may reveal previously overlooked information transmission in those regions.

## 364 **Materials and Methods**

### 365 **Animals**

366 All experiments were approved by the RIKEN Wako animal experiments committee and were  
367 performed according to the guidelines of the animal facilities of the RIKEN Center for Brain  
368 Science. Larval tiger salamanders were provided by Charles D. Sullivan Co. Inc., Nashville,  
369 Tennessee, USA.

### 370 **Recording and Stimulation**

371 Retinal recording was performed as described previously [48]. Dark-adapted retinæ from larval  
372 male and female tiger salamanders were isolated in oxygenated Ringer's medium at 25 °C. A  
373 piece of the retina (2–4 mm in width) was mounted on a flat array of 61 microelectrodes (MED-  
374 P2H07A, Alpha MED Scientific Inc., Ibaraki, Osaka, Japan) and perfused with oxygenated  
375 Ringer's solution (2 mL/min; 25 °C). Spatially uniform white light (intensity refreshment at 30  
376 Hz; mean and SD of the intensity were 4.0 and 1.4 mW/m<sup>2</sup>, respectively) was projected through  
377 an objective lens using a CRT monitor (60-Hz refresh rate; E551, Dell Inc., Round Rock, Texas,  
378 USA) controlled by the Matlab Psychophysics Toolbox [49, 50] or a light-emitting diode  
379 (E1L53-AWOC2-01 5-B5, Toyoda Gosei, Japan). The light intensity sequence was a random  
380 Gaussian sequence (65.5–183.3 s). The same sequence was repeated typically more than 20  
381 times. For the natural scene stimulation, 200 s of a movie [51] was projected at 30 Hz using the  
382 CRT monitor (64 × 64 pixels, 60.6 µm/pixel; the mean intensity was 4.0 mW/m<sup>2</sup>). Amplified  
383 voltage signals from the electrodes were stored and action potentials of single units were isolated  
384 using a Matlab program (a gift from Dr. Stephan A. Baccus). Analyses were performed using  
385 stable cells with mean firing rates >1.7 Hz.

## 386 Identification of Bursts and Events

387 Histograms of the ISIs were generated for each isolated ganglion cell. The histograms often had  
388 two distinct peaks (Fig 1B) representing shorter and longer ISIs, corresponding to intra- and  
389 interburst ISIs, respectively [3-5]. The threshold interval  $T_{thresh}$  was set at the trough between the  
390 two peaks in the ISI histogram (Fig 1B).  $T_{thresh}$  was  $38.6 \pm 20.0$  ms (mean  $\pm$  SD) for 41 cells  
391 stimulated with the spatially uniform stimulation, and  $87.7 \pm 18.5$  ms for the 16 cells stimulated with  
392 the natural scene movie. If two consecutive spikes occurred with an interval shorter than  $T_{thresh}$ , they  
393 were incorporated into the same burst, while they were separated into two consecutive bursts if the  
394 interval was longer than  $T_{thresh}$  (Fig 1C). The robustness of this method was examined as follows.  
395 Bursts were defined using various threshold intervals of  $\sim 10$  ms to  $\sim 100$  ms, and the rates of the  
396 isolated spikes and bursts with 2–7 spikes were measured (Fig 1D).  $r_{-10}$ ,  $r_0$ , and  $r_{+10}$  (Hz) denote  
397 the rates of the 2-spike bursts defined by the threshold intervals  $T_{thresh}-10$  ms,  $T_{thresh}$ , and  $T_{thresh}+10$   
398 ms, respectively. The maximum rate change,  $\max(|r_{-10} - r_0|, |r_{+10} - r_0|)/r_0$ , was  $0.021 \pm 0.020$   
399 (mean  $\pm$  SD,  $n = 41$ ) for cells stimulated with the spatially uniform stimulation, and  $0.022 \pm 0.014$  for  
400 the 16 cells stimulated with the natural scene movie. These small values indicate the robustness of  
401 the method. The median intraburst ISIs of the 2-spike bursts and the median of the duration ( $ISI_1 +$   
402  $ISI_2$ ) of the 3-spike bursts were  $8.1 \pm 2.8$  and  $14.4 \pm 4.7$  ms (mean  $\pm$  SD,  $n = 41$ ), respectively, for the  
403 cells stimulated with the spatially uniform stimulation, and  $15.4 \pm 5.6$  and  $29.0 \pm 9.8$  ms,  
404 respectively, for the 16 cells stimulated with the natural scene movie.

405 Events were determined as follows. The first spikes of bursts were extracted (Fig 1E, top) and  
406 merged across different repeats of the stimulus presentation (black in Fig 1E, middle). The intervals  
407 of these merged first spikes were then measured and a histogram was generated (Fig 1F). The  
408 histogram had two peaks separated by  $T_{thresh}$  (red and blue in Fig 1F), indicating that the intervals

409 were composed of short intervals representing inter-trial fluctuation (red in Fig 1E, middle, and red  
410 in Fig 1F) and longer intervals separating the consecutive events (blue in Fig 1E, middle, and blue in  
411 Fig 1F). Thus, if two consecutively merged first spikes were closer than  $T_{thresh}$ , they were  
412 incorporated into the same event; otherwise, they were assigned into two consecutive events (Fig 1E,  
413 bottom). The robustness of the method was evaluated as follows. If bursts occurred with a large  
414 timing jitter in different repeats, two consecutive bursts in one repeat were incorporated into one  
415 event. However, this occurred for only  $2.7\% \pm 2.7\%$  of bursts for the cells (mean  $\pm$  SD,  $n = 41$ )  
416 stimulated with the spatially uniform stimulation, and  $3.5\% \pm 1.1\%$  for the cells stimulated with the  
417 natural scene movie ( $n = 16$ ). The values were small, indicating that the definition of events was  
418 robust.

## 419 **Experimental Design and Statistical Analyses**

420 The numbers of the analyzed cells and retinae were as follows. Salamanders:  $n = 41$  cells in 15  
421 retinae for spatially uniform stimulation, and  $n = 16$  cells in 4 retinae for natural scene  
422 stimulation.

423 Correlations between the spike number and the intraburst ISIs of the bursts were investigated  
424 using data from ganglion cells stimulated with the spatially uniform stimulation as follows. For  
425 each event  $j$  in which at least one 2-spike burst occurred, the average number of spikes ( $n^{(j)}$ ) and  
426 the average intraburst ISIs of the 2-spike bursts ( $m^{(j)}$ ) were determined. The correlation between  
427  $n^{(j)}$  and  $m^{(j)}$  was then calculated across events. Similar correlations were calculated for  $ISI_1$  and  
428  $ISI_2$  of the 3-spike bursts.

429 Mutual information conveyed by the burst spike number was determined as follows. When  
430 the stimulation was repeated, bursts occurred in a limited number of discrete events that were  
431 defined at specific time points of the sequence (Fig 1A). Therefore, it was investigated how far

432 the receiver of bursts can specify the events by knowing the spike number, as compared to the  
433 case where the receiver receives bursts without knowing the spike number.  $N_{\text{Rep}}$  and  $N_{\text{Ev}}$   
434 represent the number of stimulus repeats and the number of events, respectively.  $n_k^{(j)}$  represents  
435 the number of  $k$ -spike bursts that occurred in the  $j$ -th event during the  $N_{\text{Rep}}$  repeats of  
436 stimulation ( $k = 0, 1, 2, \dots, k_{\text{max}}; j = 1, \dots, N_{\text{Ev}}$ ), where  $k_{\text{max}}$  is the largest number of  
437 spikes in a burst. For all  $j$ ,  $\sum_{k=0}^{k_{\text{max}}} n_k^{(j)} = N_{\text{Rep}}$ . The number of all bursts that occurred in the  $j$ -th  
438 event is  $n_{\text{Burst}}^{(j)} = \sum_{k=1}^{k_{\text{max}}} n_k^{(j)}$ , and the total number of bursts is  $N_{\text{Burst}} = \sum_{j=1}^{N_{\text{Ev}}} n_{\text{Burst}}^{(j)}$ . When a burst  
439 was generated, the probability that the burst was in the  $j$ -th event is  $n_{\text{Burst}}^{(j)} / N_{\text{Burst}}$ . Thus, the prior  
440 entropy of events, calculated for the event probability after receiving a burst without knowing the  
441 spike number, is  $H_{\text{Burst}} = \sum_{j=1}^{N_{\text{Ev}}} \frac{n_{\text{Burst}}^{(j)}}{N_{\text{Burst}}} \log_2 \frac{n_{\text{Burst}}^{(j)}}{N_{\text{Burst}}}$ . If the burst was  $k$ -spike, the posterior probability  
442 that the burst was in the  $j$ -th event is  $n_k^{(j)} / N_k$ , where  $N_k = \sum_{j=1}^{N_{\text{Ev}}} n_k^{(j)}$  is the total number of  $k$ -  
443 spike bursts. Thus, the posterior entropy is  $H_{k\text{-spike}} = \sum_{j=1}^{N_{\text{Ev}}} \frac{n_k^{(j)}}{N_k} \log_2 \frac{n_k^{(j)}}{N_k}$ . The mutual information  
444 is  $I_{\text{number}} = H_{\text{Burst}} - \sum_{k=1}^{k_{\text{max}}} p(k\text{-spike}) \cdot H_{k\text{-spike}}$ , where  $p(k\text{-spike}) = N_k / N_{\text{Burst}}$  is the  
445 probability of  $k$ -spike bursts. To evaluate the statistical significance, surrogate data were  
446 generated by exchanging the spike number of each burst with that of a randomly selected burst.  
447 One hundred surrogate data were generated and  $I_{\text{number}}^{\text{sur } l}$  was calculated for the  $l$ -th surrogate ( $l =$   
448  $1, \dots, 100$ ). If  $N_{\text{larger}}$  of  $I_{\text{number}}^{\text{sur } l}$  was larger than  $I_{\text{number}}$ , the statistical significance is  $P =$   
449  $N_{\text{larger}} / 100$ . The estimated mutual information was corrected by the bias correction method [52].  
450 Information conveyed by intraburst ISIs was calculated as follows. Intraburst ISIs of 2-spike  
451 bursts, and  $\text{ISI}_1$  and  $\text{ISI}_2$  of 3-spike bursts were divided into 4 groups according to the length of  
452 the ISIs, so that each group had as equal number of ISIs as much as possible. Two- and 3-spike



453 bursts were thus divided into 4 and 16 groups, respectively.  $n_{k,q}^{(j)}$  denotes the number of  $k$ -spike  
 454 bursts of the group  $q$  in the  $j$ -th event ( $q = 1, \dots, q_{\max}$ ;  $q_{\max} = 4$  for  $k = 2$ ,  $q_{\max} = 16$  for  $k = 3$ ). The  
 455 total number of  $k$ -spike bursts of the group  $q$  is  $N_{k,q} = \sum_{j=1}^{N_{\text{Ev}}} n_{k,q}^{(j)}$ . When a  $k$ -spike burst of the  
 456 group  $p$  occurred, the posterior entropy is  $H_{k,q} = \sum_{j=1}^{N_{\text{Ev}}} \frac{n_{k,q}^{(j)}}{N_{k,q}} \log_2 \frac{n_{k,q}^{(j)}}{N_{k,q}}$ . The information conveyed  
 457 by ISIs is  $I_{k\text{-spike ISI}} = H_{k\text{-spike}} - \sum_{q=1}^{q_{\max}} p(\text{group } q | k\text{-spike}) \cdot H_{k,q}$ , where  $p(\text{group } q | k\text{-spike}) =$   
 458  $N_{k,q}/N_k$ . Statistical significance was evaluated similar to the spike number analysis. The  
 459 information value was corrected for the bias [52].

460 Coordinate transformation of 3-spike burst ISIs was performed as follows (Fig 4B–D). For 3-  
 461 spike bursts in event  $j$ , the average and standard deviation of  $\text{ISI}_1$  were designated as  $\overline{\text{ISI}}_1^{(j)}$  and  
 462  $\text{SD}_1^{(j)}$ , respectively.  $\text{SD}_1^{(j)}$  was linearly fitted with  $\overline{\text{ISI}}_1^{(j)}$  ( $j = 1, \dots, N_{\text{Ev}}$ ) as  $\text{SD}_1^{(j)} \cong$   
 463  $a_1 (\overline{\text{ISI}}_1^{(j)} - m_1)$ , where  $a_1$  and  $m_1$  are constants (Fig 4C, top). For a variable  $v_1 =$   
 464  $\log_{10}(\text{ISI}_1 [\text{ms}] - m_1 [\text{ms}])$ ,  $\frac{dv_1}{d\text{ISI}_1} = (\text{ISI}_1 - m_1)^{-1} (\log 10)^{-1}$ , and thus the standard deviation  
 465 of  $v_1$  in each event was similar among different events (see bursts shown in different colors in  
 466 Fig 4D). Bursts with  $\text{ISI}_1 \leq m_1$  were removed from the analysis.  $v_2$  was similarly defined for  
 467  $\text{ISI}_2$  (Fig 4C, bottom). The principle axes of the distribution of  $v_1$  and  $v_2$  were determined  
 468 (Fig 4D), and new variables  $u_1$  and  $u_2$  were defined by scaling  $v_1$  and  $v_2$  along these axes  
 469 so that the standard deviations along these axes were equal to 1 (Fig 4E).  $u_1$  and  $u_2$  were  
 470 shifted so that their averages were zero. The burst phase was  $\text{atan2}(u_2, u_1)$  (Fig 4E).

471 To characterize the stimulus features encoded by bursts, the stimulus sequences preceding  
 472 bursts of a specific spike number, intraburst ISIs within a specific range, or burst phase within a  
 473 specific range, were collected. The average and SEM values of the collected sequences were then

474 used for the analyses. Neurons that generated only small numbers of 2- or 3-spike bursts were  
475 removed from the analyses (see legends for Figs 3G, 5D, 6C, and 6D). For linear reconstruction,  
476 stimulus sequences preceding the spikes in three-spike bursts were collected and averaged. The  
477 average sequence was divided by three and then used as the STA for the reconstruction (Fig 5G–  
478 I).

## 479 **Data Availability**

480 The central data and computer codes used in this paper are available the open science framework  
481 database at: <https://osf.io/29ect/>. Other data and codes are available upon request.

## 482 **Acknowledgements**

483 We thank Dr. Markus Meister for providing us with unpublished data and unstinting  
484 encouragement. We also thank Takao K. Hensch, Shun-ichi Amari, Shin Yanagihara, Neal  
485 Hessler, Yoshihiro Yoshihara, Stephan A. Baccus, Bence P. Ölveczky, Nick Lesica, Xin Jing,  
486 Charles Yokoyama, Naoki Masuda, Shiro Ikeda, Makoto Kaneda, Tomoki Fukai, Keita  
487 Watanabe, and Tetsuya Haga for thoughtful discussions.

## 488 **Author contributions**

489 **Conceptualization:** Toshihiko Hosoya.

490 **Data curation:** Toshiyuki Ishii, Toshihiko Hosoya.

491 **Formal analysis:** Toshiyuki Ishii, Toshihiko Hosoya.

492 **Funding acquisition:** Toshihiko Hosoya.

493 **Investigation:** Toshiyuki Ishii.

494 **Methodology:** Toshiyuki Ishii, Toshihiko Hosoya.

495 **Project administration:** Toshihiko Hosoya.

496 **Resources:** Toshihiko Hosoya.

497 **Software:** Toshihiko Hosoya.

498 **Supervision:** Toshihiko Hosoya.

499 **Validation:** Toshiyuki Ishii, Toshihiko Hosoya.

500 **Visualization:** Toshiyuki Ishii, Toshihiko Hosoya.

501 **Writing – original draft:** Toshihiko Hosoya.

502 **Writing – review & editing:** Toshiyuki Ishii, Toshihiko Hosoya.

## 503 **References**

504 1. Brenner N, Strong SP, Koberle R, Bialek W, de Ruyter van Steveninck RR. Synergy in a  
505 neural code. *Neural Comput.* 2000;12(7):1531-52. PubMed PMID: 10935917.

506 2. Rieke FDW, de Ruyter van Steveninck R, Bialek W. *Spikes: Cambridge, Massachusetts:*  
507 *MIT Press; 1997.*

508 3. Berry MJ, Warland DK, Meister M. The structure and precision of retinal spike trains. *Proc*  
509 *Natl Acad Sci U S A.* 1997;94(10):5411-6. doi: 10.1073/pnas.94.10.5411. PubMed PMID:  
510 9144251; PubMed Central PMCID: PMCPMC24692.

511 4. Keat J, Reinagel P, Reid RC, Meister M. Predicting every spike: a model for the responses of  
512 visual neurons. *Neuron.* 2001;30(3):803-17. doi: 10.1016/s0896-6273(01)00322-1. PubMed  
513 PMID: 11430813.

514 5. Reinagel P, Godwin D, Sherman SM, Koch C. Encoding of visual information by LGN  
515 bursts. *J Neurophysiol.* 1999;81(5):2558-69. doi: 10.1152/jn.1999.81.5.2558. PubMed

- 516 PMID: 10322089.
- 517 6. Denning KS, Reinagel P. Visual control of burst priming in the anesthetized lateral  
518 geniculate nucleus. *J Neurosci*. 2005;25(14):3531-8. doi: 10.1523/JNEUROSCI.4417-  
519 04.2005. PubMed PMID: 15814783; PubMed Central PMCID: PMC6725375.
- 520 7. Lisman JE. Bursts as a unit of neural information: making unreliable synapses reliable.  
521 *Trends Neurosci*. 1997;20(1):38-43. doi: 10.1016/S0166-2236(96)10070-9. PubMed PMID:  
522 9004418.
- 523 8. Oswald AM, Chacron MJ, Doiron B, Bastian J, Maler L. Parallel processing of sensory input  
524 by bursts and isolated spikes. *J Neurosci*. 2004;24(18):4351-62. doi:  
525 10.1523/JNEUROSCI.0459-04.2004. PubMed PMID: 15128849; PubMed Central PMCID:  
526 PMC6729439.
- 527 9. Krahe R, Gabbiani F. Burst firing in sensory systems. *Nat Rev Neurosci*. 2004;5(1):13-23.  
528 doi: 10.1038/nrn1296. PubMed PMID: 14661065.
- 529 10. Zeldenrust F, Wadman WJ, Englitz B. Neural Coding With Bursts-Current State and Future  
530 Perspectives. *Front Comput Neurosci*. 2018;12:48. doi: 10.3389/fncom.2018.00048.  
531 PubMed PMID: 30034330; PubMed Central PMCID: PMC6043860.
- 532 11. DeBusk BC, DeBruyn EJ, Snider RK, Kabara JF, Bonds AB. Stimulus-dependent  
533 modulation of spike burst length in cat striate cortical cells. *J Neurophysiol*. 1997;78(1):199-  
534 213. doi: 10.1152/jn.1997.78.1.199. PubMed PMID: 9242274.
- 535 12. Eggermont JJ, Smith GM. Burst-firing sharpens frequency-tuning in primary auditory  
536 cortex. *Neuroreport*. 1996;7(3):753-7. doi: 10.1097/00001756-199602290-00018. PubMed  
537 PMID: 8733738.
- 538 13. Eyherabide HG, Rokem A, Herz AV, Samengo I. Burst firing is a neural code in an insect

- 539 auditory system. *Front Comput Neurosci*. 2008;2:3. doi: 10.3389/neuro.10.003.2008.
- 540 PubMed PMID: 18946533; PubMed Central PMCID: PMCPMC2525941.
- 541 14. Eyherabide HG, Rokem A, Herz AV, Samengo I. Bursts generate a non-reducible spike-  
542 pattern code. *Front Neurosci*. 2009;3(1):8-14. doi: 10.3389/neuro.01.002.2009. PubMed  
543 PMID: 19753092; PubMed Central PMCID: PMCPMC2695386.
- 544 15. Marsat G, Pollack GS. The structure and size of sensory bursts encode stimulus information  
545 but only size affects behavior. *J Comp Physiol A Neuroethol Sens Neural Behav Physiol*.  
546 2010;196(4):315-20. doi: 10.1007/s00359-010-0514-8. PubMed PMID: 20213110.
- 547 16. Marsat G, Pollack GS. Bursting neurons and ultrasound avoidance in crickets. *Front*  
548 *Neurosci*. 2012;6:95. doi: 10.3389/fnins.2012.00095. PubMed PMID: 22783158; PubMed  
549 Central PMCID: PMCPMC3387578.
- 550 17. Martinez-Conde S, Macknik SL, Hubel DH. The function of bursts of spikes during visual  
551 fixation in the awake primate lateral geniculate nucleus and primary visual cortex. *Proc Natl*  
552 *Acad Sci U S A*. 2002;99(21):13920-5. doi: 10.1073/pnas.212500599. PubMed PMID:  
553 12361982; PubMed Central PMCID: PMCPMC129798.
- 554 18. Mathy A, Ho SS, Davie JT, Duguid IC, Clark BA, Hausser M. Encoding of oscillations by  
555 axonal bursts in inferior olive neurons. *Neuron*. 2009;62(3):388-99. doi:  
556 10.1016/j.neuron.2009.03.023. PubMed PMID: 19447094; PubMed Central PMCID:  
557 PMCPMC2777250.
- 558 19. Mease RA, Kuner T, Fairhall AL, Groh A. Multiplexed Spike Coding and Adaptation in the  
559 Thalamus. *Cell Rep*. 2017;19(6):1130-40. doi: 10.1016/j.celrep.2017.04.050. PubMed  
560 PMID: 28494863; PubMed Central PMCID: PMCPMC5554799.
- 561 20. Alitto HJ, Weyand TG, Usrey WM. Distinct properties of stimulus-evoked bursts in the

- 562 lateral geniculate nucleus. *J Neurosci.* 2005;25(2):514-23. doi: 10.1523/JNEUROSCI.3369-  
563 04.2005. PubMed PMID: 15647497; PubMed Central PMCID: PMC6725468.
- 564 21. Lesica NA, Stanley GB. Encoding of natural scene movies by tonic and burst spikes in the  
565 lateral geniculate nucleus. *J Neurosci.* 2004;24(47):10731-40. doi:  
566 10.1523/JNEUROSCI.3059-04.2004. PubMed PMID: 15564591; PubMed Central PMCID:  
567 PMCPMC6730113.
- 568 22. Lesica NA, Weng C, Jin J, Yeh CI, Alonso JM, Stanley GB. Dynamic encoding of natural  
569 luminance sequences by LGN bursts. *PLoS Biol.* 2006;4(7):e209. doi:  
570 10.1371/journal.pbio.0040209. PubMed PMID: 16756389; PubMed Central PMCID:  
571 PMCPMC1475766.
- 572 23. Butts DA, Desbordes G, Weng C, Jin J, Alonso JM, Stanley GB. The episodic nature of  
573 spike trains in the early visual pathway. *J Neurophysiol.* 2010;104(6):3371-87. doi:  
574 10.1152/jn.00078.2010. PubMed PMID: 20926615; PubMed Central PMCID:  
575 PMCPMC3007659.
- 576 24. Izhikevich EM, Desai NS, Walcott EC, Hoppensteadt FC. Bursts as a unit of neural  
577 information: selective communication via resonance. *Trends Neurosci.* 2003;26(3):161-7.  
578 doi: 10.1016/S0166-2236(03)00034-1. PubMed PMID: 12591219.
- 579 25. Oswald AM, Doiron B, Maler L. Interval coding. I. Burst interspike intervals as indicators of  
580 stimulus intensity. *J Neurophysiol.* 2007;97(4):2731-43. doi: 10.1152/jn.00987.2006.  
581 PubMed PMID: 17409176.
- 582 26. Gollisch T, Meister M. Rapid neural coding in the retina with relative spike latencies.  
583 *Science.* 2008;319(5866):1108-11. doi: 10.1126/science.1149639. PubMed PMID:  
584 18292344.

- 585 27. Fairhall AL, Lewen GD, Bialek W, de Ruyter Van Steveninck RR. Efficiency and ambiguity  
586 in an adaptive neural code. *Nature*. 2001;412(6849):787-92. doi: 10.1038/35090500.  
587 PubMed PMID: 11518957.
- 588 28. Panzeri S, Brunel N, Logothetis NK, Kayser C. Sensory neural codes using multiplexed  
589 temporal scales. *Trends Neurosci*. 2010;33(3):111-20. Epub 2010/01/05. doi:  
590 10.1016/j.tins.2009.12.001. PubMed PMID: 20045201.
- 591 29. Ghosh KK, Bujan S, Haverkamp S, Feigenspan A, Wässle H. Types of bipolar cells in the  
592 mouse retina. *J Comp Neurol*. 2004;469(1):70-82. doi: 10.1002/cne.10985. PubMed PMID:  
593 14689473.
- 594 30. MacNeil MA, Heussy JK, Dacheux RF, Raviola E, Masland RH. The population of bipolar  
595 cells in the rabbit retina. *J Comp Neurol*. 2004;472(1):73-86. doi: 10.1002/cne.20063.  
596 PubMed PMID: 15024753.
- 597 31. Pignatelli V, Strettoi E. Bipolar cells of the mouse retina: a gene gun, morphological study. *J*  
598 *Comp Neurol*. 2004;476(3):254-66. doi: 10.1002/cne.20207. PubMed PMID: 15269969.
- 599 32. Wu SM, Gao F, Maple BR. Functional architecture of synapses in the inner retina:  
600 segregation of visual signals by stratification of bipolar cell axon terminals. *J Neurosci*.  
601 2000;20(12):4462-70. PubMed PMID: 10844015; PubMed Central PMCID:  
602 PMCPMC6772452.
- 603 33. Awatramani GB, Slaughter MM. Origin of transient and sustained responses in ganglion  
604 cells of the retina. *J Neurosci*. 2000;20(18):7087-95. PubMed PMID: 10995856; PubMed  
605 Central PMCID: PMCPMC6772807.
- 606 34. DeVries SH. Bipolar cells use kainate and AMPA receptors to filter visual information into  
607 separate channels. *Neuron*. 2000;28(3):847-56. doi: 10.1016/s0896-6273(00)00158-6.

- 608 PubMed PMID: 11163271.
- 609 35. Euler T, Haverkamp S, Schubert T, Baden T. Retinal bipolar cells: elementary building  
610 blocks of vision. *Nat Rev Neurosci.* 2014;15(8):507-19. PubMed PMID: 25158357.
- 611 36. Ichinose T, Fyk-Kolodziej B, Cohn J. Roles of ON cone bipolar cell subtypes in temporal  
612 coding in the mouse retina. *J Neurosci.* 2014;34(26):8761-71. doi:  
613 10.1523/JNEUROSCI.3965-13.2014. PubMed PMID: 24966376; PubMed Central PMCID:  
614 PMCPMC4069354.
- 615 37. Ichinose T, Hellmer CB. Differential signalling and glutamate receptor compositions in the  
616 OFF bipolar cell types in the mouse retina. *J Physiol.* 2016;594(4):883-94. doi:  
617 10.1113/JP271458. PubMed PMID: 26553530; PubMed Central PMCID:  
618 PMCPMC4753269.
- 619 38. Franke K, Berens P, Schubert T, Bethge M, Euler T, Baden T. Inhibition decorrelates visual  
620 feature representations in the inner retina. *Nature.* 2017;542(7642):439-44. doi:  
621 10.1038/nature21394. PubMed PMID: 28178238; PubMed Central PMCID:  
622 PMCPMC5325673.
- 623 39. Levine MW, Cleland BG. An analysis of the effect of retinal ganglion cell impulses upon the  
624 firing probability of neurons in the dorsal lateral geniculate nucleus of the cat. *Brain Res.*  
625 2001;902(2):244-54. doi: 10.1016/s0006-8993(01)02411-8. PubMed PMID: 11384618.
- 626 40. Mastrorarde DN. Two classes of single-input X-cells in cat lateral geniculate nucleus. II.  
627 Retinal inputs and the generation of receptive-field properties. *J Neurophysiol.*  
628 1987;57(2):381-413. doi: 10.1152/jn.1987.57.2.381. PubMed PMID: 3559685.
- 629 41. Rathbun DL, Warland DK, Usrey WM. Spike timing and information transmission at  
630 retinogeniculate synapses. *J Neurosci.* 2010;30(41):13558-66. doi:



- 631 10.1523/JNEUROSCI.0909-10.2010. PubMed PMID: 20943897; PubMed Central PMCID:  
632 PMCPMC2970570.
- 633 42. Rowe MH, Fischer Q. Dynamic properties of retino-geniculate synapses in the cat. *Vis*  
634 *Neurosci.* 2001;18(2):219-31. doi: 10.1017/s0952523801182076. PubMed PMID:  
635 11417797.
- 636 43. Sincich LC, Adams DL, Economides JR, Horton JC. Transmission of spike trains at the  
637 retinogeniculate synapse. *J Neurosci.* 2007;27(10):2683-92. doi:  
638 10.1523/JNEUROSCI.5077-06.2007. PubMed PMID: 17344406; PubMed Central PMCID:  
639 PMCPMC6672514.
- 640 44. Usrey WM, Reppas JB, Reid RC. Paired-spike interactions and synaptic efficacy of retinal  
641 inputs to the thalamus. *Nature.* 1998;395(6700):384-7. doi: 10.1038/26487. PubMed PMID:  
642 9759728.
- 643 45. Weyand TG. Retinogeniculate transmission in wakefulness. *J Neurophysiol.*  
644 2007;98(2):769-85. doi: 10.1152/jn.00929.2006. PubMed PMID: 17553944.
- 645 46. Usrey WM, Alonso JM, Reid RC. Synaptic interactions between thalamic inputs to simple  
646 cells in cat visual cortex. *J Neurosci.* 2000;20(14):5461-7. PubMed PMID: 10884329.
- 647 47. Rathbun DL, Alitto HJ, Weyand TG, Usrey WM. Interspike interval analysis of retinal  
648 ganglion cell receptive fields. *J Neurophysiol.* 2007;98(2):911-9. doi:  
649 10.1152/jn.00802.2006. PubMed PMID: 17522169; PubMed Central PMCID:  
650 PMCPMC2752417.
- 651 48. Meister M, Pine J, Baylor DA. Multi-neuronal signals from the retina: acquisition and  
652 analysis. *J Neurosci Methods.* 1994;51(1):95-106. doi: 10.1016/0165-0270(94)90030-2.  
653 PubMed PMID: 8189755.

- 654 49. Brainard DH. The Psychophysics Toolbox. *Spat Vis.* 1997;10(4):433-6. PubMed PMID:  
655 9176952.
- 656 50. Pelli DG. The VideoToolbox software for visual psychophysics: transforming numbers into  
657 movies. *Spat Vis.* 1997;10(4):437-42. PubMed PMID: 9176953.
- 658 51. van Hateren JH. Processing of natural time series of intensities by the visual system of the  
659 blowfly. *Vision Res.* 1997;37(23):3407-16. doi: 10.1016/s0042-6989(97)00105-3. PubMed  
660 PMID: 9425553.
- 661 52. Panzeri S, Senatore R, Montemurro MA, Petersen RS. Correcting for the sampling bias  
662 problem in spike train information measures. *J Neurophysiol.* 2007;98(3):1064-72. doi:  
663 10.1152/jn.00559.2007. PubMed PMID: 17615128.
